# Supplementary material for: Population Pharmacokinetic Analysis of Cefaclor in Healthy Korean Subjects
Source: MDPI journal article supplement (doi:10.3390/pharmaceutics13050754), 2021-05-19
Supplement: s1 [file s1]

# Supplementary Materials: Population Pharmacokinetic Analysis of Cefaclor in Healthy Korean Subjects

Seung-Hyun Jeong, Ji-Hun Jang, Hea-Young Cho and Yong-Bok Lee

## Supplementary tables

**Table S1.** Previously reported pharmacokinetic parameter values of cefaclor in Koreans obtained by non-compartmental analysis.

| References              | Subjects                              | Pharmacokinetic parameters |                 |                   |                            |                  |
|-------------------------|---------------------------------------|----------------------------|-----------------|-------------------|----------------------------|------------------|
|                         |                                       | $T_{1/2}$ (h)              | $T_{max}$ (h)   | $C_{max}$ (µg/mL) | $AUC_{0-\infty}$ (h·µg/mL) | CL/F (L/h)       |
| Yun et al. (2002) [15]  | Human ( $n = 20$ , 250 mg dose, male) | 1.29–1.32                  | 0.83–0.90       | 5.00–5.11         | 6.88–7.14                  | 35.31–36.00      |
| Chun et al. (2002) [16] | Human ( $n = 16$ , 500 mg dose, male) | – <sup>a</sup>             | 0.83–0.89       | 12.17–13.03       | 15.76–17.65 <sup>b</sup>   | – <sup>a</sup>   |
| Cho et al. (2005) [12]  | Human ( $n = 24$ , 250 mg dose, male) | – <sup>a</sup>             | 0.76–0.82       | 6.72–6.90         | 7.73–7.88 <sup>b</sup>     | – <sup>a</sup>   |
| Kim et al. (2005) [17]  | Human ( $n = 24$ , 250 mg dose, male) | – <sup>a</sup>             | 0.72–0.79       | 5.36–5.43         | 6.60–6.67 <sup>b</sup>     | – <sup>a</sup>   |
| In this study           | Human ( $n = 48$ , 250 mg dose, male) | $0.68 \pm 0.15$            | $0.80 \pm 0.28$ | $7.87 \pm 2.20$   | $9.83 \pm 2.41$            | $27.19 \pm 7.77$ |

<sup>a</sup>, information not provided in those reports. <sup>b</sup>,  $AUC_{0-t}$  provided in those reports.

**Table S2.** Previously reported pharmacokinetic parameter values of cefaclor in non-Koreans.

| References                   | Subjects (healthy humans)                  | Dose     | Pharmacokinetic parameters |                 |                   |                            |                    |
|------------------------------|--------------------------------------------|----------|----------------------------|-----------------|-------------------|----------------------------|--------------------|
|                              |                                            |          | $T_{1/2}$ (h)              | $T_{max}$ (h)   | $C_{max}$ (µg/mL) | $AUC_{0-\infty}$ (h·µg/mL) | CL/F (L/h)         |
| Bloch et al. (1977) [5]      | $n = 25$ , Male in USA                     | 250 mg   | 0.7–1                      | – <sup>a</sup>  | – <sup>a</sup>    | – <sup>a</sup>             | – <sup>a</sup>     |
| Spyker et al. (1978) [4]     | $n = 24$ , Male in USA                     | 500 mg   | – <sup>a</sup>             | $0.88 \pm 0.33$ | $23.1 \pm 7.7$    | – <sup>a</sup>             | – <sup>a</sup>     |
| Lode et al. (1979) [18]      | $n = 12$ , Male = 6, Female = 6 in Germany | 1,000 mg | – <sup>a</sup>             | – <sup>a</sup>  | $34.6 \pm 7.8$    | $74.5 \pm 9.9$             | – <sup>a</sup>     |
| Welling et al. (1979) [19]   | – <sup>a</sup>                             | 500 mg   | – <sup>a</sup>             | 1–1.5           | – <sup>a</sup>    | – <sup>a</sup>             | – <sup>a</sup>     |
| Barbhaiya et al. (1990) [20] | $n = 12$ , Male in USA                     | 250 mg   | $0.5 \pm 0.2$              | $0.5 \pm 0.0$   | $10.6 \pm 2.4$    | $8.7 \pm 1.4$              | $10.92 \pm 6.54^b$ |
| Barbhaiya et al. (1990) [21] | $n = 12$ , Male in USA                     | 250 mg   | $0.83 \pm 0.21$            | 0.4–1.0         | $8.70 \pm 2.72$   | $8.60 \pm 1.43$            | – <sup>a</sup>     |
| Barbhaiya et al. (1990) [22] | $n = 12$ , Male in USA                     | 500 mg   | $0.54 \pm 0.10$            | – <sup>a</sup>  | $16.7 \pm 3.67$   | $16.9 \pm 2.5$             | $22.62 \pm 3.68^b$ |

|                                  |                                           |        |                 |                 |                 |                  |                  |
|----------------------------------|-------------------------------------------|--------|-----------------|-----------------|-----------------|------------------|------------------|
| Oguma et al. (1991) [26]         | $n = 8$ ,<br>Male in Japan                | 500 mg | 0.59            | $-^a$           | $-^a$           | $18.6^c$         | $-^a$            |
| Nix et al. (1997) [23]           | $n = 12$ ,<br>Male = 7, Female = 5 in USA | 500 mg | $0.69 \pm 0.17$ | $0.92 \pm 0.43$ | $15.9 \pm 5.72$ | $20.6 \pm 3.38$  | $24.9 \pm 4.38$  |
| Sourgens et al. (1997) [25]      | $-^a$                                     | $-^a$  | 0.5–0.7         | 0.5–1           | $-^a$           | $-^a$            | $-^a$            |
| Granados-Soto et al. (2003) [24] | $n = 6$ ,<br>Male in Mexico               | 500 mg | $-^a$           | $0.87 \pm 0.06$ | $11.45 \pm 1.6$ | $14.93 \pm 1.64$ | $-^a$            |
| Li et al. (2009) [7]             | $n = 18$ ,<br>Female in USA               | 500 mg | $0.59 \pm 0.09$ | 0.5–2           | $13.4 \pm 3.5$  | $21.2 \pm 4.2$   | $23.82 \pm 4.96$ |

<sup>a</sup>, information not provided in those reports. <sup>b</sup>, information provided as renal clearance (CL<sub>R</sub>). <sup>c</sup>, AUC<sub>0–t</sub> provided in those reports.

### Supplementary figure

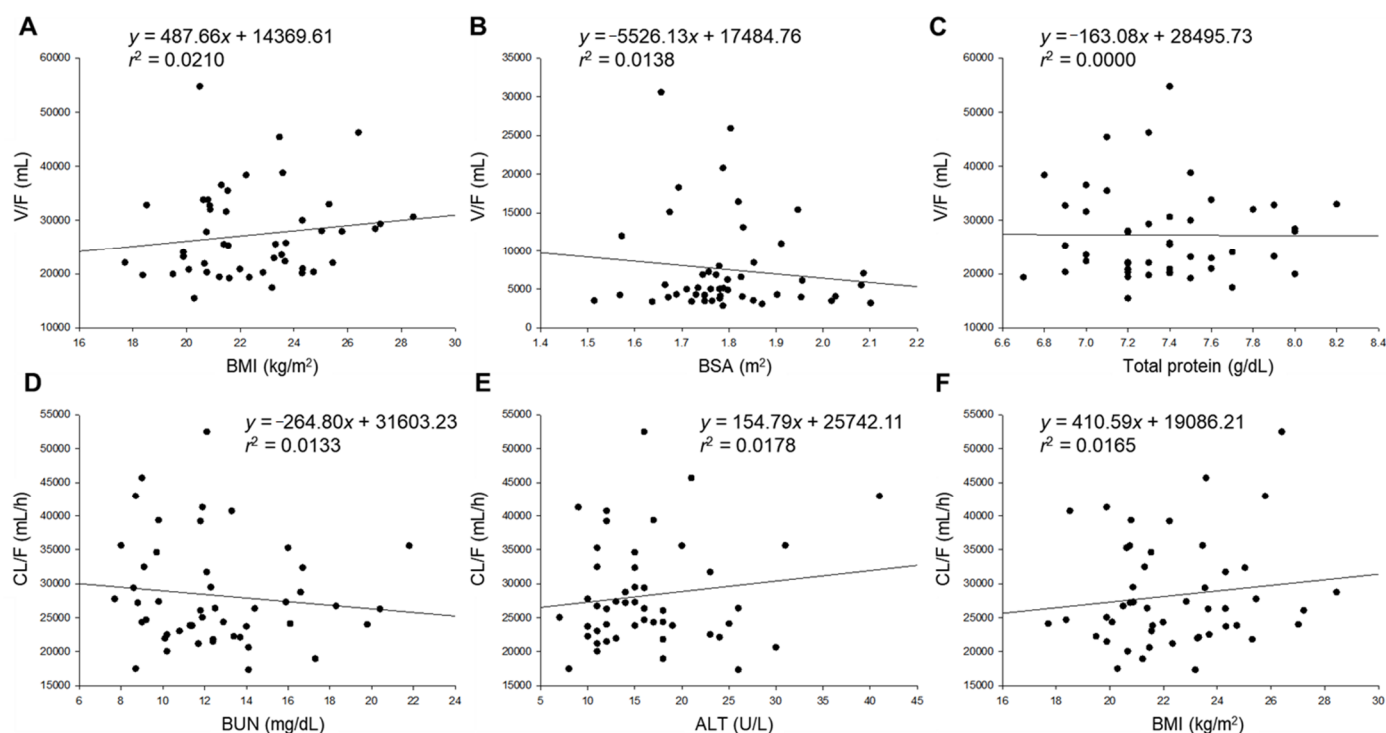

**Figure S1.** Relationship between subjects' characteristics and individual predicted pharmacokinetic parameters. V/F of cefaclor according to BMI (A), V/F of cefaclor according to BSA (B), V/F of cefaclor according to total protein (C), CL/F of cefaclor according to BUN (D), CL/F of cefaclor according to ALT (E), and CL/F of cefaclor according to BMI (F).
